# Supplementary material for: Hypoglycemic effect of the polysaccharides fromAstragalus membranaceuson type 2 diabetic mice based on the “gut microbiota–mucosal barrier”
Source: Royal Society of Chemistry journal article supplement (doi:10.1039/d2fo02300h), 2022-01-01

**Hypoglycemic effect of polysaccharide from *Astragalus membranaceus* on type 2  
diabetic mice based on “gut microbiota-mucosal barrier”**

Xiaoxia Chen<sup>a</sup>, Chun Chen<sup>a, b, c, d \*</sup>, and Xiong Fu<sup>a, b, c, d \*\*</sup>

<sup>a</sup> SCUT-Zhuhai Institute of Modern Industrial Innovation, School of Food Science and Engineering, South China University of Technology, 381 Wushan Road, Guangzhou 510640, China

<sup>b</sup> Guangzhou Institute of Modern Industrial Technology, Nansha, 511458, China

<sup>c</sup> Guangdong Province Key Laboratory for Green Processing of Natural Products and Product Safety, Guangzhou 510640, China

<sup>d</sup> Overseas Expertise Introduction Center for Discipline Innovation of Food Nutrition and Human Health (111 Center), Guangzhou 510640, China

Corresponding author

\*Chun Chen: [chenc@scut.edu.cn](mailto:chenc@scut.edu.cn)

\*\*Xiong Fu: [lxfu@scut.edu.cn](mailto:lxfu@scut.edu.cn)

**Table S1.** Chemical properties and composition of APP extracted from *A. membranaceus*.

| Item                                        | APP           |
|---------------------------------------------|---------------|
| Yield (%)                                   | 3.64%         |
| Neutral sugar (%)                           | 68.77 ± 0.24% |
| Uronic acid (%)                             | 16.21 ± 0.12% |
| Protein (%)                                 | 2.66 ± 0.09%  |
| Monosaccharide composition (Molar ratio, %) |               |
| Arabinose                                   | 13.60%        |
| Galactose                                   | 7.20%         |
| Glucose                                     | 63.73%        |
| Xylose                                      | 0.25%         |
| Mannose                                     | 0.13%         |
| Galacturonic acid                           | 14.73%        |
| Glucuronic acid                             | 0.37%         |
| Molecular weight distribution               |               |
| Peak 1                                      | 161.15 kDa    |
| Content                                     | 80.02%        |
| Peak 2                                      | 5022 Da       |
| Content                                     | 19.98%        |

**Table S2.** Spearman correlations among 5 key genera and T2DM-related indicators altered by APP.

|       |               | <i>Allobaculum</i> |       | <i>Lactobacillus</i> |       | <i>Cupriavidus</i> |       | <i>Halomonas</i> |       | <i>Shigella</i> |       |
|-------|---------------|--------------------|-------|----------------------|-------|--------------------|-------|------------------|-------|-----------------|-------|
|       |               | r                  | P     | r                    | P     | r                  | P     | r                | P     | r               | P     |
| Serum | Body weight   | 0.741              | 0.002 | 0.777                | 0.001 | -0.471             | 0.076 | -0.482           | 0.069 | -0.777          | 0.001 |
|       | FBG           | -0.627             | 0.012 | -0.633               | 0.011 | 0.481              | 0.070 | 0.612            | 0.015 | 0.939           | 0.000 |
|       | HOMA-IR       | -0.756             | 0.001 | -0.775               | 0.001 | 0.524              | 0.045 | 0.611            | 0.016 | 0.873           | 0.000 |
|       | TC            | -0.756             | 0.001 | -0.709               | 0.003 | 0.327              | 0.234 | 0.742            | 0.002 | 0.807           | 0.000 |
|       | TG            | -0.655             | 0.008 | -0.639               | 0.010 | 0.442              | 0.099 | .688             | 0.005 | 0.934           | 0.000 |
|       | LDL-C         | -0.608             | 0.016 | -0.644               | 0.010 | 0.541              | 0.037 | 0.519            | 0.048 | 0.945           | 0.000 |
|       | HDL-C         | 0.630              | 0.012 | 0.622                | 0.013 | -0.420             | 0.119 | -0.622           | 0.013 | -0.901          | 0.000 |
|       | D-LA          | -0.864             | 0.000 | -0.875               | 0.000 | 0.574              | 0.025 | 0.684            | 0.005 | 0.645           | 0.009 |
|       | DAO           | -0.918             | 0.000 | -0.884               | 0.000 | 0.306              | 0.268 | 0.687            | 0.005 | 0.600           | 0.018 |
|       | LPS           | -0.790             | 0.000 | -0.825               | 0.000 | 0.562              | 0.029 | 0.579            | 0.024 | 0.857           | 0.000 |
| Colon | TNF- $\alpha$ | -0.907             | 0.000 | -0.917               | 0.000 | 0.458              | 0.086 | 0.622            | 0.013 | 0.720           | 0.002 |
|       | IL-10         | 0.050              | 0.858 | 0.120                | 0.670 | -0.196             | 0.483 | 0.065            | 0.817 | -0.633          | 0.011 |
|       | IL-6          | -0.655             | 0.008 | -0.611               | 0.016 | 0.360              | 0.187 | 0.731            | 0.002 | 0.818           | 0.000 |
|       | IL-1 $\beta$  | -0.884             | 0.000 | -0.818               | 0.000 | 0.164              | 0.560 | 0.709            | 0.003 | 0.578           | 0.024 |
|       | Colon length  | 0.053              | 0.850 | 0.038                | 0.892 | -0.197             | 0.482 | -0.290           | 0.295 | -0.503          | 0.056 |
|       | SOD           | 0.790              | 0.000 | 0.677                | 0.006 | -0.120             | 0.670 | -0.874           | 0.000 | -0.710          | 0.003 |
|       | CAT           | 0.891              | 0.000 | 0.863                | 0.000 | -0.349             | 0.202 | -0.699           | 0.004 | -0.699          | 0.004 |
|       | MDA           | -0.711             | 0.003 | -0.644               | 0.010 | 0.295              | 0.286 | 0.786            | 0.001 | 0.720           | 0.002 |

|       |             |        |       |        |       |        |       |        |       |        |       |
|-------|-------------|--------|-------|--------|-------|--------|-------|--------|-------|--------|-------|
|       | GSH         | 0.959  | 0.000 | 0.896  | 0.000 | -0.230 | 0.411 | -0.765 | 0.001 | -0.601 | 0.018 |
|       | Liver index | -0.789 | 0.000 | -0.687 | 0.005 | 0.153  | 0.587 | 0.851  | 0.000 | 0.720  | 0.002 |
|       | AST         | -0.840 | 0.000 | -0.818 | 0.000 | 0.327  | 0.234 | 0.633  | 0.011 | 0.644  | 0.010 |
|       | ALT         | -0.697 | 0.004 | -0.622 | 0.013 | 0.311  | 0.259 | 0.835  | 0.000 | 0.770  | 0.001 |
| Liver | Hepatic     | 0.707  | 0.003 | 0.635  | 0.011 | -0.263 | 0.344 | -0.799 | 0.000 | -0.831 | 0.000 |
|       | glycogen    |        |       |        |       |        |       |        |       |        |       |
|       | TC          | -0.747 | 0.001 | -0.739 | 0.002 | 0.465  | 0.080 | 0.679  | 0.005 | 0.838  | 0.000 |
|       | TG          | -0.724 | 0.002 | -0.645 | 0.009 | 0.241  | 0.388 | 0.810  | 0.000 | 0.810  | 0.000 |

### **Supplementary Figure Captions:**

**Fig. S1.** Food consumption (A), water consumption (C) and body weight (E) curves of experimental mice were measured throughout the 6-weeks period. Food consumption (B), water consumption (D) and body weight (F) of experimental mice were measured at week 6. Data were presented as means  $\pm$  SEM. \* $P < 0.05$ ; \*\* $P < 0.01$ ; \*\*\* $P < 0.001$ ; ns, not statistically significant.

**Fig. S2.** The levels of (A) GSH, (B) CAT, (C) SOD, and (D) MDA in liver of experimental mice were analyzed after 6 weeks of APP and MA treatment. Data were presented as means  $\pm$  SEM. \* $P < 0.05$ , \*\* $P < 0.01$ , \*\*\* $P < 0.001$ ; ns, not statistically significant.

**Fig. S3.** APP improved the pathological characteristics of epididymal adipose in T2DM mice. The effects of APP on (A) epididymal fat weight and (B) epididymal fat index were studied. Data were presented as means  $\pm$  SEM. \* $P < 0.05$ , \*\* $P < 0.01$ , \*\*\* $P < 0.001$ ; ns, not statistically significant. H&E staining was conducted of (C) epididymal adipose (400 $\times$ ).

**Fig. S4.** APP improved the pathological characteristics of pancreas in T2DM mice. The effects of APP on (A) pancreas weight and (B) pancreas index were studied. Data were presented as means  $\pm$  SEM. \* $P < 0.05$ , \*\* $P < 0.01$ ; ns, not statistically significant. H&E staining was conducted of (C) pancreas (400 $\times$ ).

Fig. S1.

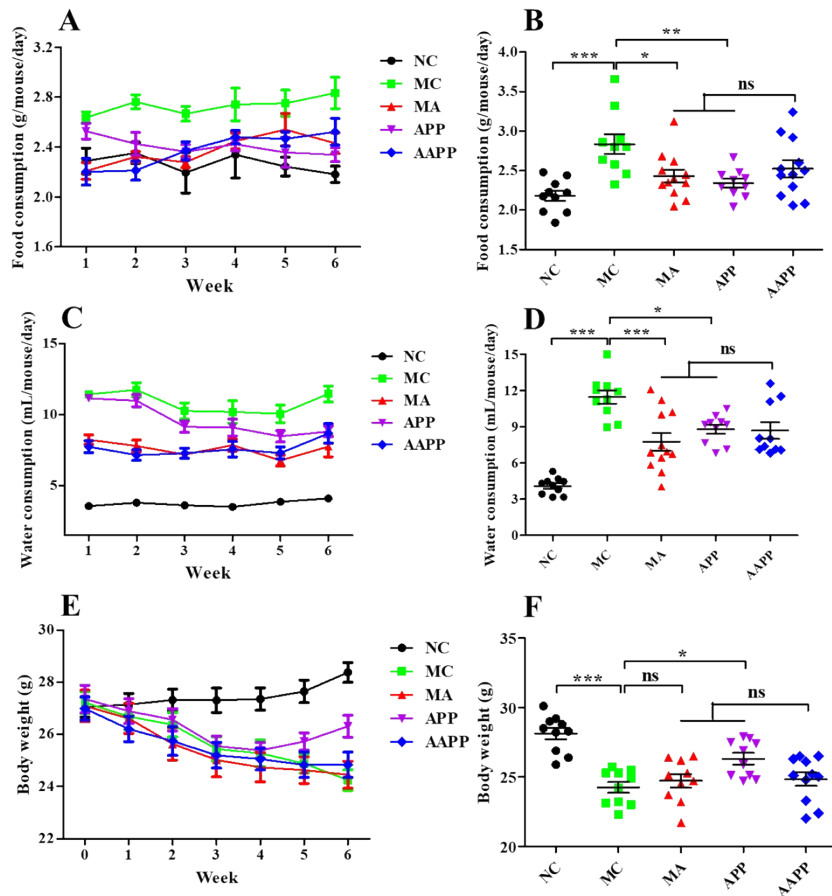

**Fig. S2.**

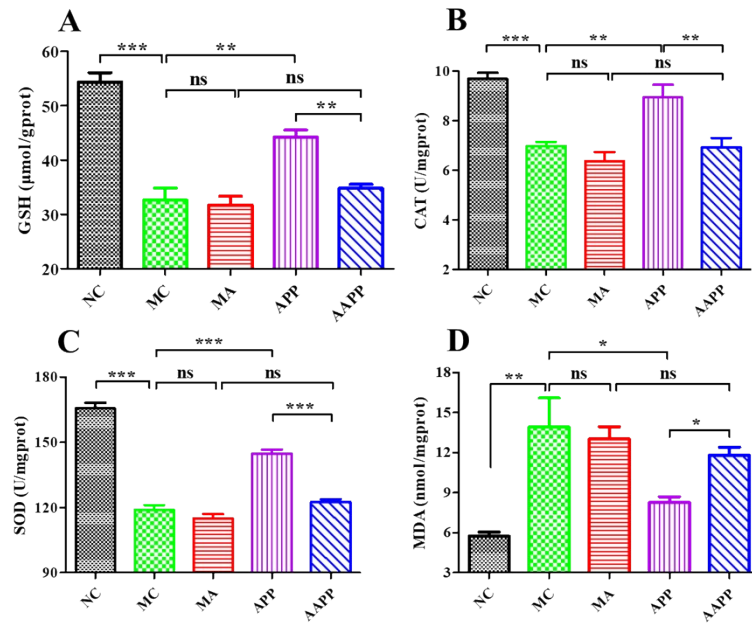

**Fig. S3.**

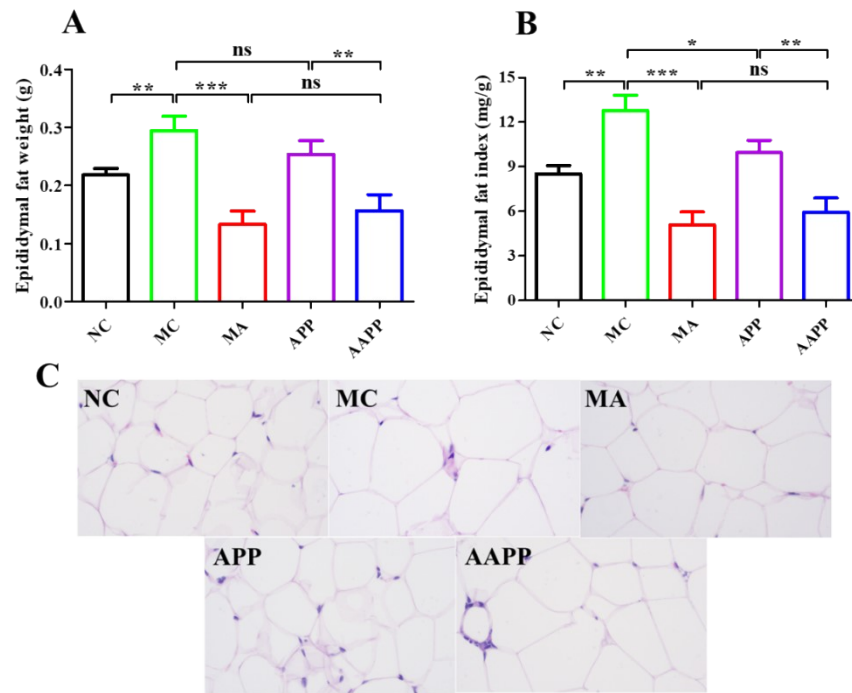



**Fig. S4.**

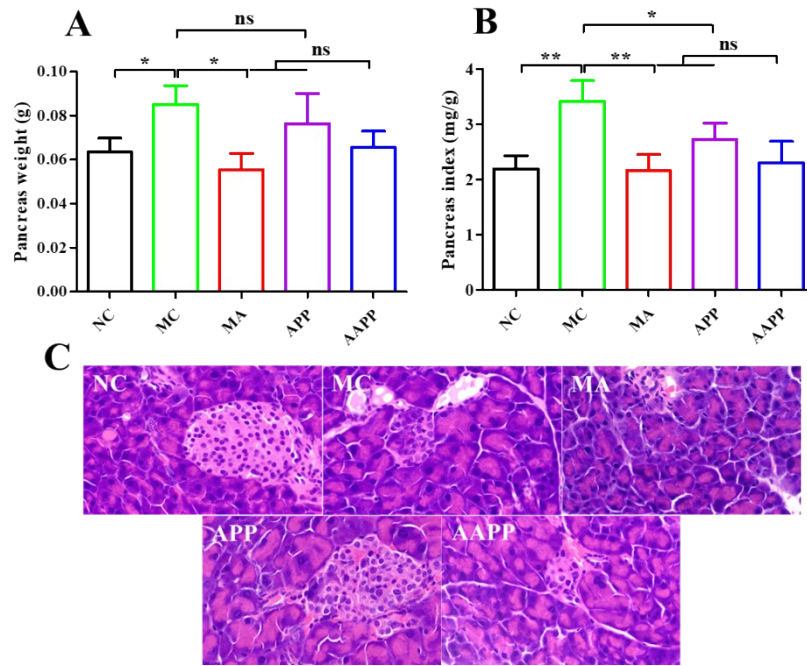

Supplement: d2fo02300h1.pdf [file d2fo02300h1.pdf]
